# Supplementary material for: The Genetic Drift Inventory: A Tool for Measuring What Advanced Undergraduates Have Mastered about Genetic Drift
Source: Atypon-hosted journal article supplement (doi:10.1187/cbe.13-08-0159), 2014-03-01
Supplement: combinedsupmats3.pdf [file combinedsupmats3.pdf]

# Supplemental Material

*CBE—Life Sciences Education*

Price *et al.*

**Appendix 3. Answer Key. See Appendix 2 for statements.**

| GeDI Statement Number | Answer   |
|-----------------------|----------|
| 1                     | Agree    |
| 2                     | Disagree |
| 3                     | Agree    |
| 4                     | Agree    |
| 5                     | Disagree |
| 6                     | Disagree |
| 7                     | Disagree |
| 8                     | Disagree |
| 9                     | Disagree |
| 10                    | Agree    |
| 11                    | Disagree |
| 12                    | Disagree |
| 13                    | Agree    |
| 14                    | Disagree |
| 15                    | Agree    |
| 16                    | Disagree |
| 17                    | Disagree |
| 18                    | Disagree |
| 19                    | Disagree |
| 20                    | Disagree |
| 21                    | Disagree |
| 22                    | Disagree |
